# Supplementary material
Source: Springer Nature journal article supplement (https://www.springermedizin.de/resource/supplementary/12998_2011_25_MOESM3_ESM.pdf/9680000)

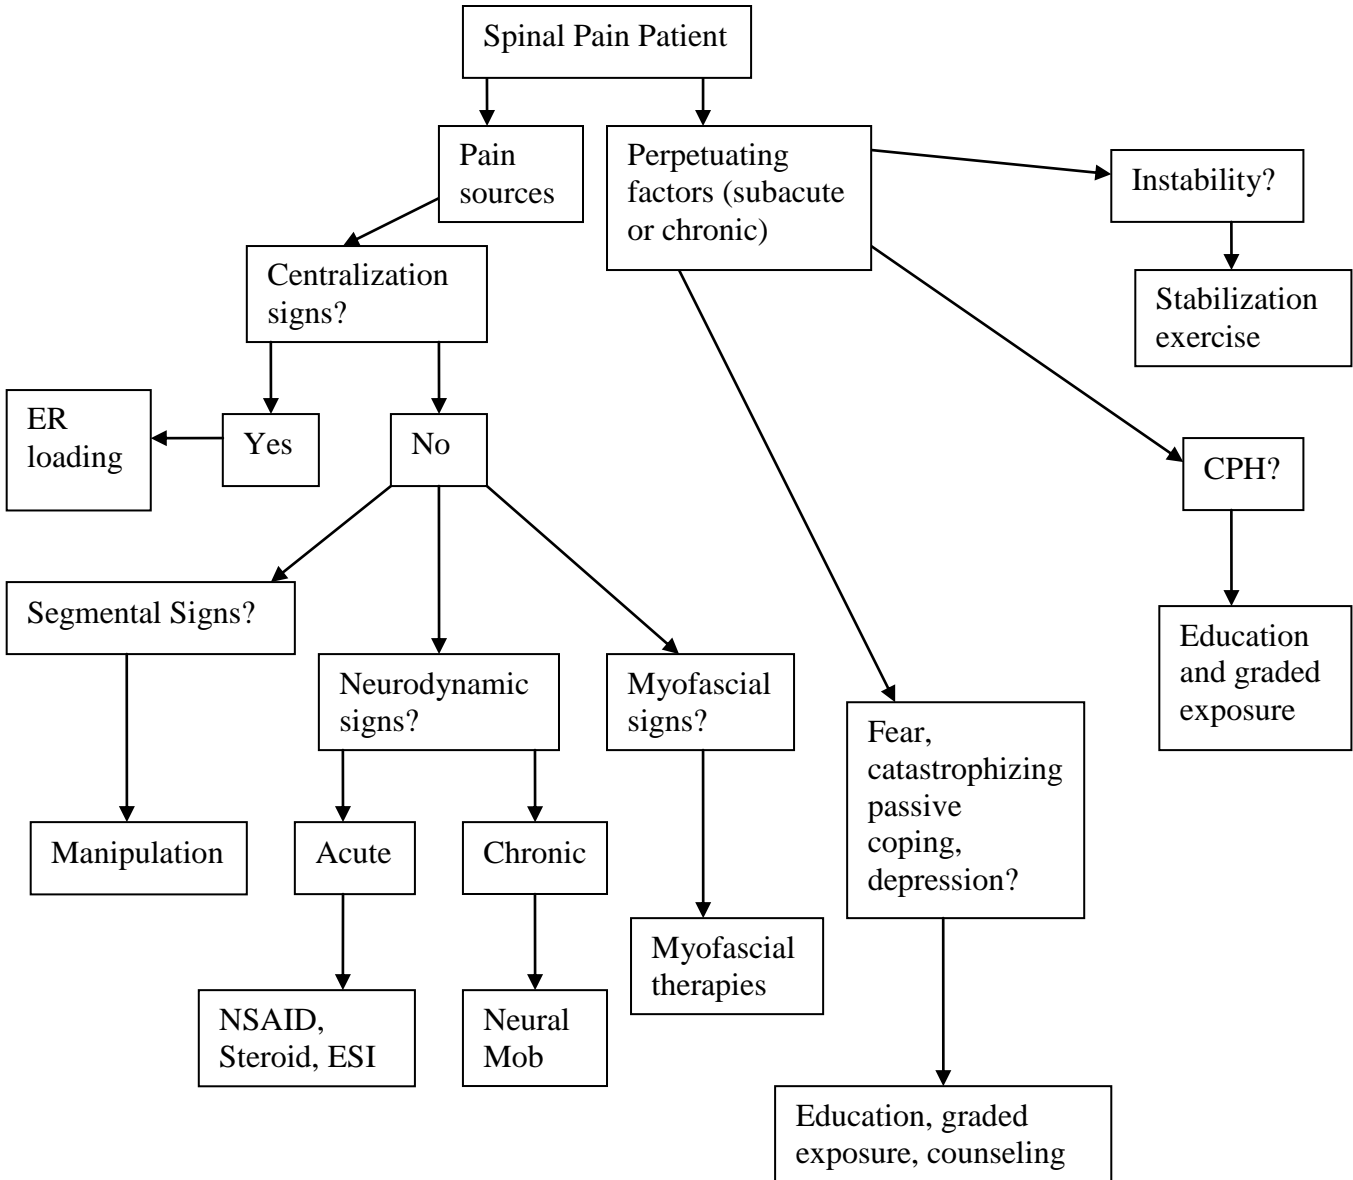

Supplement: MOESM3 [file 9680000]
